# Supplementary material for: Mediterranean Diet and SARS-COV-2 Infection: Is There Any Association? A Proof-of-Concept Study
Source: MDPI journal article supplement (doi:10.3390/nu13051721), 2021-05-19
Supplement: s1 [file s1]

**Table 1 Supplementary.** Mediterranean scores by SARS-COV-2 infection

|            |      | SARS-COV-2 |      | P      |
|------------|------|------------|------|--------|
| All        |      | yes        | No   |        |
| Number     | 900  | 148        | 752  |        |
| Milk       |      |            |      |        |
| 0          | 60.6 | 62.8       | 60.1 |        |
| 1          | 19.2 | 23.7       | 18.4 |        |
| 2          | 20.2 | 13.5       | 21.5 | 0.052  |
| Meat       |      |            |      |        |
| 0          | 22.3 | 24.3       | 21.9 |        |
| 1          | 27.7 | 30.4       | 27.1 |        |
| 2          | 50.0 | 45.3       | 50.9 | 0.45   |
| Fruit      |      |            |      |        |
| 0          | 39.3 | 48.7       | 37.5 |        |
| 1          | 21.8 | 27.0       | 20.7 |        |
| 2          | 38.9 | 24.3       | 41.8 | <0.001 |
| Vegetables |      |            |      |        |
| 0          | 30.4 | 41.9       | 28.2 |        |
| 1          | 22.2 | 24.3       | 21.8 |        |
| 2          | 47.3 | 33.8       | 50.0 | <0.001 |
| Legumes    |      |            |      |        |
| 0          | 15.9 | 18.2       | 15.4 |        |
| 1          | 59.2 | 62.8       | 58.5 |        |
| 2          | 24.9 | 18.9       | 26.1 | 0.17   |
| Cereals    |      |            |      |        |
| 0          | 5.2  | 11.5       | 4.0  |        |
| 1          | 7.3  | 8.8        | 7.1  |        |
| 2          | 87.4 | 79.7       | 89.0 | <0.001 |
| Fish       |      |            |      |        |
| 0          | 28.8 | 30.4       | 28.5 |        |
| 1          | 65.2 | 63.5       | 66.6 |        |
| 2          | 6.0  | 6.1        | 6.0  | 0.89   |
| Olive oil  |      |            |      |        |
| 0          | 6.1  | 9.5        | 5.5  |        |
| 1          | 16.2 | 21.6       | 15.2 |        |
| 2          | 77.7 | 68.9       | 79.4 | 0.017  |
| Alcohol    |      |            |      |        |
| 0          | 3.7  | 4.1        | 3.6  |        |
| 1          | 83.8 | 82.4       | 84.0 |        |
| 2          | 12.6 | 13.5       | 12.4 | 0.89   |

**Table 2 Supplementary.** Association between SARS-COV-2 infection (yes *vs* no) and adherence to the MeD (categorical scores) by logistic regression analyses

|                            | OR   | 95% CI    | P            |
|----------------------------|------|-----------|--------------|
| Total carbohydrate (%kcal) | 1.00 | 0.97-1.04 | 0.84         |
| Saturated fats (%kcal)     | 1.01 | 0.96-1.05 | 0.83         |
| Protein (%kcal)            | 1.05 | 0.98-1.11 | 0.16         |
| Fiber (g/day)              | 0.99 | 0.95-1.02 | 0.45         |
| Fruit*                     |      |           |              |
| 0                          | 1.00 |           |              |
| 1                          | 1.38 | 0.82-2.32 | 0.23         |
| 2                          | 0.70 | 0.39-1.25 | 0.23         |
| Vegetables*                |      |           |              |
| 0                          | 1.00 |           |              |
| 1                          | 0.83 | 0.47-1.49 | 0.54         |
| 2                          | 0.67 | 0.35-1.28 | 0.23         |
| Cereals*                   |      | 0.45-0.90 |              |
| 0                          | 1.00 |           |              |
| 1                          | 0.38 | 0.15-0.93 | <b>0.035</b> |
| 2                          | 0.33 | 0.16-0.69 | <b>0.003</b> |
| Olive oil*                 |      |           |              |
| 0                          | 1.00 |           |              |
| 1                          | 0.91 | 0.42-1.96 | 0.82         |
| 2                          | 0.86 | 0.38-1.96 | 0.73         |

\*Categorical variables: 0=0 points at the Medi-Lite adherence score (reference category); 1=1 point at the Medi-Lite adherence score; 2=2 points at the Medi-Lite adherence score

**Table 3 Supplementary.** Mediterranean scores by SARS-COV-2 severity

|            | Asymptomatic | Symptomatic | Hospital admission | p            |
|------------|--------------|-------------|--------------------|--------------|
| Number     | 36           | 103         | 9                  |              |
| Milk       |              |             |                    |              |
| 0          | 69.4         | 59.2        | 77.8               |              |
| 1          | 13.9         | 28.2        | 11.1               |              |
| 2          | 16.7         | 12.6        | 11.1               | 0.40         |
| Meat       |              |             |                    |              |
| 0          | 22.2         | 25.2        | 22.2               |              |
| 1          | 30.6         | 28.2        | 55.6               |              |
| 2          | 47.2         | 46.6        | 22.2               | 0.51         |
| Fruit      |              |             |                    |              |
| 0          | 44.4         | 48.5        | 66.7               |              |
| 1          | 22.2         | 30.1        | 11.1               |              |
| 2          | 33.3         | 21.4        | 22.2               | 0.43         |
| Vegetables |              |             |                    |              |
| 0          | 33.3         | 41.8        | 77.8               |              |
| 1          | 16.7         | 29.1        | 0.0                |              |
| 2          | 50.0         | 29.1        | 22.2               | <b>0.024</b> |
| Legumes    |              |             |                    |              |
| 0          | 25.0         | 13.6        | 44.4               |              |
| 1          | 61.1         | 64.1        | 55.6               |              |
| 2          | 13.9         | 22.3        | 0.0                | 0.08         |
| Cereals    |              |             |                    |              |
| 0          | 5.6          | 10.7        | 44.4               |              |
| 1          | 2.8          | 10.7        | 11.1               |              |
| 2          | 91.7         | 78.6        | 44.4               | <b>0.008</b> |
| Fish       |              |             |                    |              |
| 0          | 30.6         | 28.2        | 55.6               |              |
| 1          | 63.9         | 65.1        | 44.4               |              |
| 2          | 5.6          | 6.8         | 0                  | 0.51         |
| Olive oil  |              |             |                    |              |
| 0          | 5.6          | 8.7         | 33.3               |              |
| 1          | 22.2         | 22.3        | 11.1               |              |
| 2          | 72.2         | 68.9        | 55.6               | 0.14         |
| Alcohol    |              |             |                    |              |
| 0          | 0.0          | 4.9         | 11.1               |              |
| 1          | 80.6         | 83.5        | 77.8               |              |
| 2          | 19.4         | 11.7        | 11.1               | 0.40         |

**Table 4 Supplementary.** Characteristics of the participants by the severity of the SARS-COV-2 infection, after combining symptomatic individuals in a unique category.

|                               | Asymptomatic | Symptomatic  | p             |
|-------------------------------|--------------|--------------|---------------|
| Number                        | 36           | 112          |               |
| Age (years)                   | 37.2±11.1    | 45.2±12.4    | <0.001        |
| Males (%)                     | 25.0         | 28.6         | 0.68          |
| Graduation (%)                | 99.4         | 88.4         | 0.30          |
| Living alone (%)              | 16.7         | 8.0          | 0.14          |
| MD (%)                        | 50.0         | 54.5         | 0.64          |
| No chronic diseases (%)       | 77.8         | 71.4         | 0.46          |
| Weight (kg)                   | 62.6±11.4    | 66.5±13.3    | 0.12          |
| Height (cm)                   | 168.4±7.5    | 167.8±8.4    | 0.69          |
| BMI (kg/m <sup>2</sup> )      | 22.1±3.7     | 23.6±4.2     | 0.06          |
| Total energy (kcal)           | 1865.0±327.4 | 1960.5±500.1 | 0.29          |
| Total carbohydrates (% kcal)  | 49.8±7.1     | 47.0±9.2     | 0.10          |
| Sugars (% kcal)               | 11.5±4.4     | 12.5±4.7     | 0.35          |
| Total fats (% kcal)           | 31.0±5.5     | 33.7±7.4     | <b>0.046</b>  |
| Saturated fats (% kcal)       | 10.5±5.4     | 13.9±6.1     | <b>0.004</b>  |
| Monounsaturated fats (% kcal) | 15.9±4.1     | 15.5±4.9     | 0.70          |
| Polyunsaturated fats (% kcal) | 4.6±1.5      | 4.3±1.6      | 0.37          |
| Proteins (% kcal)             | 17.1±3.8     | 17.0±3.3     | 0.82          |
| Fiber (g/day)                 | 20.8±6.4     | 20.5±7.6     | 0.82          |
| Mediterranean score           |              |              |               |
| Milk                          | 0.47±0.77    | 0.52±0.71    | 0.53*         |
| Meat                          | 1.25±0.80    | 1.20±0.81    | 0.77*         |
| Fruit                         | 0.89±0.89    | 0.71±0.80    | 0.32*         |
| Vegetables                    | 1.17±0.91    | 0.84±0.84    | 0.05*         |
| Legumes                       | 0.89±0.62    | 1.04±0.61    | 0.18*         |
| Cereals                       | 1.86±0.49    | 1.63±0.71    | <b>0.046*</b> |
| Fish                          | 0.75±0.55    | 0.76±0.56    | 0.94*         |
| Olive oil                     | 1.67±0.59    | 1.57±0.68    | 0.54*         |
| Alcohol                       | 1.19±0.40    | 1.06±0.41    | 0.10*         |
| Total score                   | 10.1±3.1     | 9.3±2.7      | 0.16*         |

MD=medical doctor; BMI=body mass index \*Mann-Whitney test.

**Table 5 Supplementary.** Mediterranean scores by SARS-COV-2 severity, after combining symptomatic individuals in a unique category

|            | Asymptomatic | Symptomatic | p    |
|------------|--------------|-------------|------|
| Number     | 36           | 112         |      |
| Milk       |              |             |      |
| 0          | 69.4         | 60.7        |      |
| 1          | 13.9         | 26.8        |      |
| 2          | 16.7         | 12.5        | 0.27 |
| Meat       |              |             |      |
| 0          | 22.2         | 25.0        |      |
| 1          | 30.6         | 30.4        |      |
| 2          | 47.2         | 44.6        | 0.94 |
| Fruit      |              |             |      |
| 0          | 44.4         | 50.0        |      |
| 1          | 22.2         | 28.6        |      |
| 2          | 33.3         | 21.4        | 0.34 |
| Vegetables |              |             |      |
| 0          | 33.3         | 44.6        |      |
| 1          | 16.7         | 26.8        |      |
| 2          | 50.0         | 28.6        | 0.06 |
| Legumes    |              |             |      |
| 0          | 25.0         | 16.1        |      |
| 1          | 61.1         | 63.4        |      |
| 2          | 13.9         | 20.5        | 0.40 |
| Cereals    |              |             |      |
| 0          | 5.6          | 13.4        |      |
| 1          | 2.8          | 10.7        |      |
| 2          | 91.7         | 75.9        | 0.12 |
| Fish       |              |             |      |
| 0          | 30.6         | 30.4        |      |
| 1          | 63.9         | 63.4        |      |
| 2          | 5.6          | 6.3         | 0.99 |
| Olive oil  |              |             |      |
| 0          | 5.6          | 10.7        |      |
| 1          | 22.2         | 21.4        |      |
| 2          | 72.2         | 67.9        | 0.65 |
| Alcohol    |              |             |      |
| 0          | 0.0          | 5.4         |      |
| 1          | 80.6         | 83.0        |      |
| 2          | 19.4         | 11.6        | 0.20 |
